# Supplementary figures and images for: PDL1‐positive exosomes suppress antitumor immunity by inducing tumor‐specific CD8+ T cell exhaustion during metastasis
Source: PubMed Central journal article supplement — Cancer Sci. 2021 Jul 29;112(9):3437–54. doi: 10.1111/cas.15033 (PMC8409314; doi:10.1111/cas.15033), 2021-07-29

**Fig. S3a**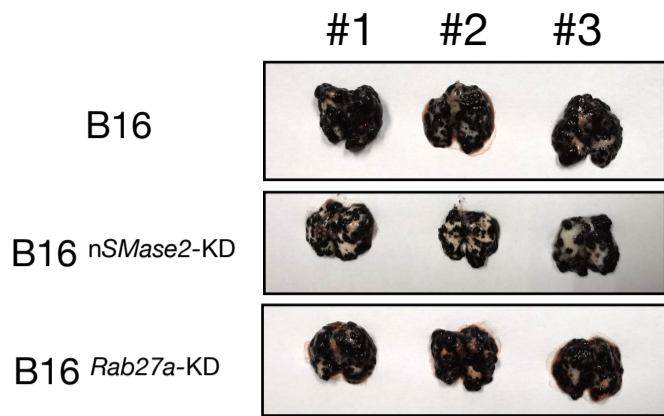**Fig. S3b**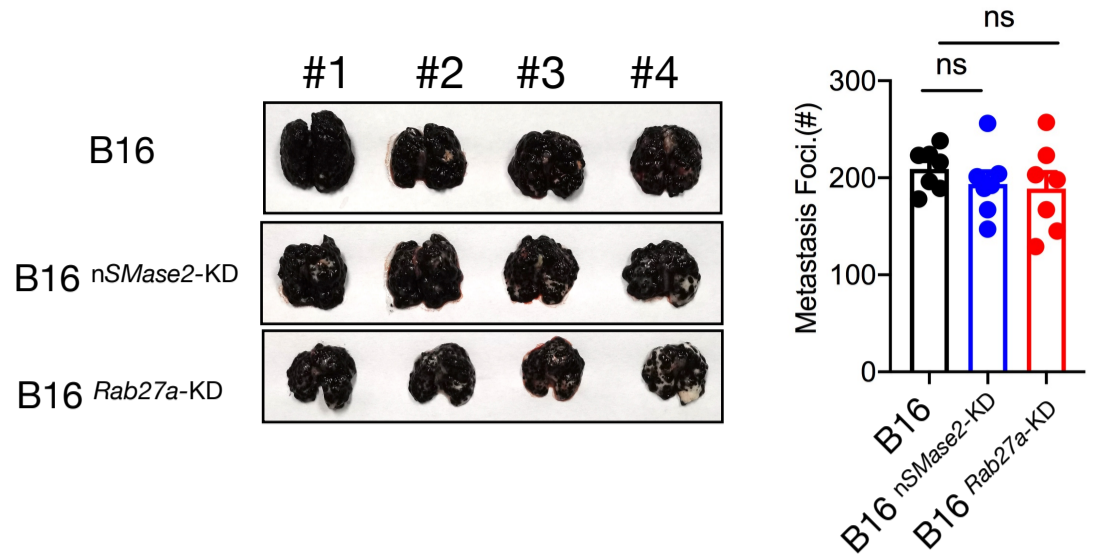**Fig. S3c**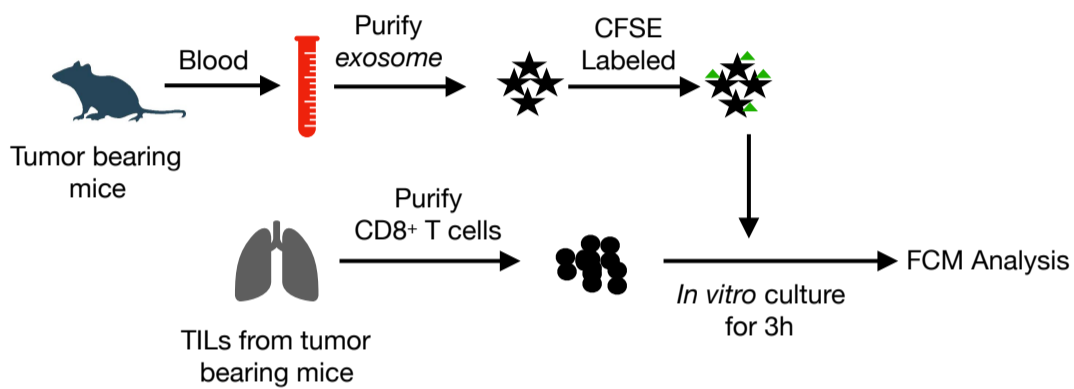**Fig. S3d**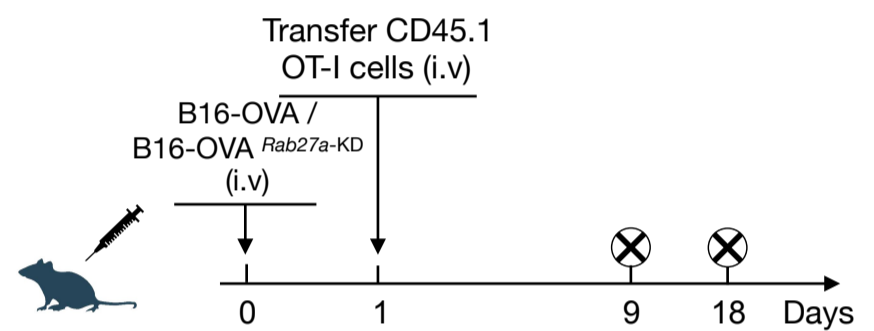**Fig. S3e**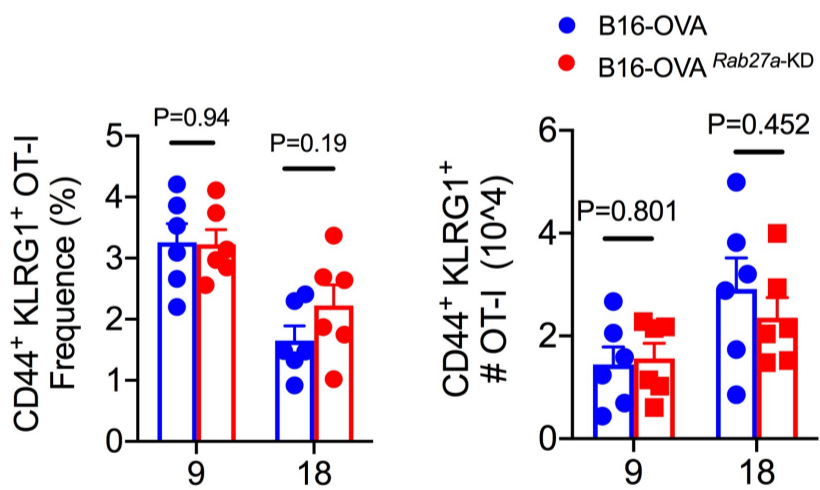**Fig. S3f**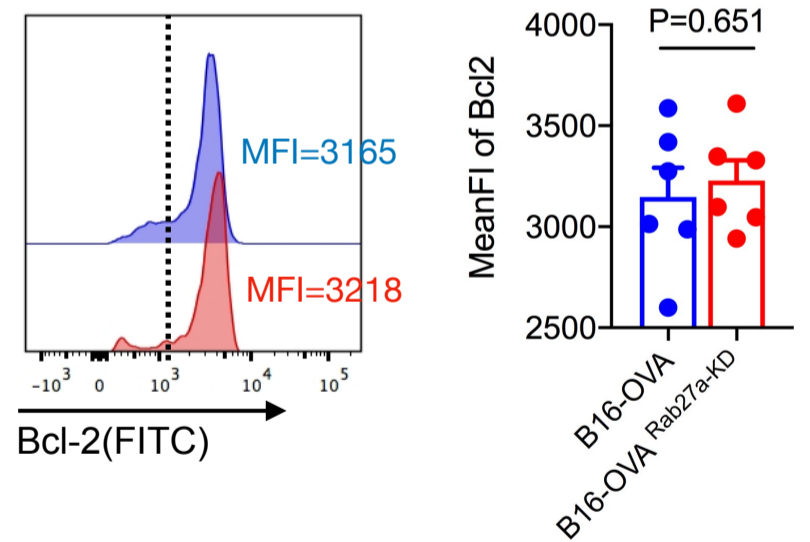

Fig. S3g

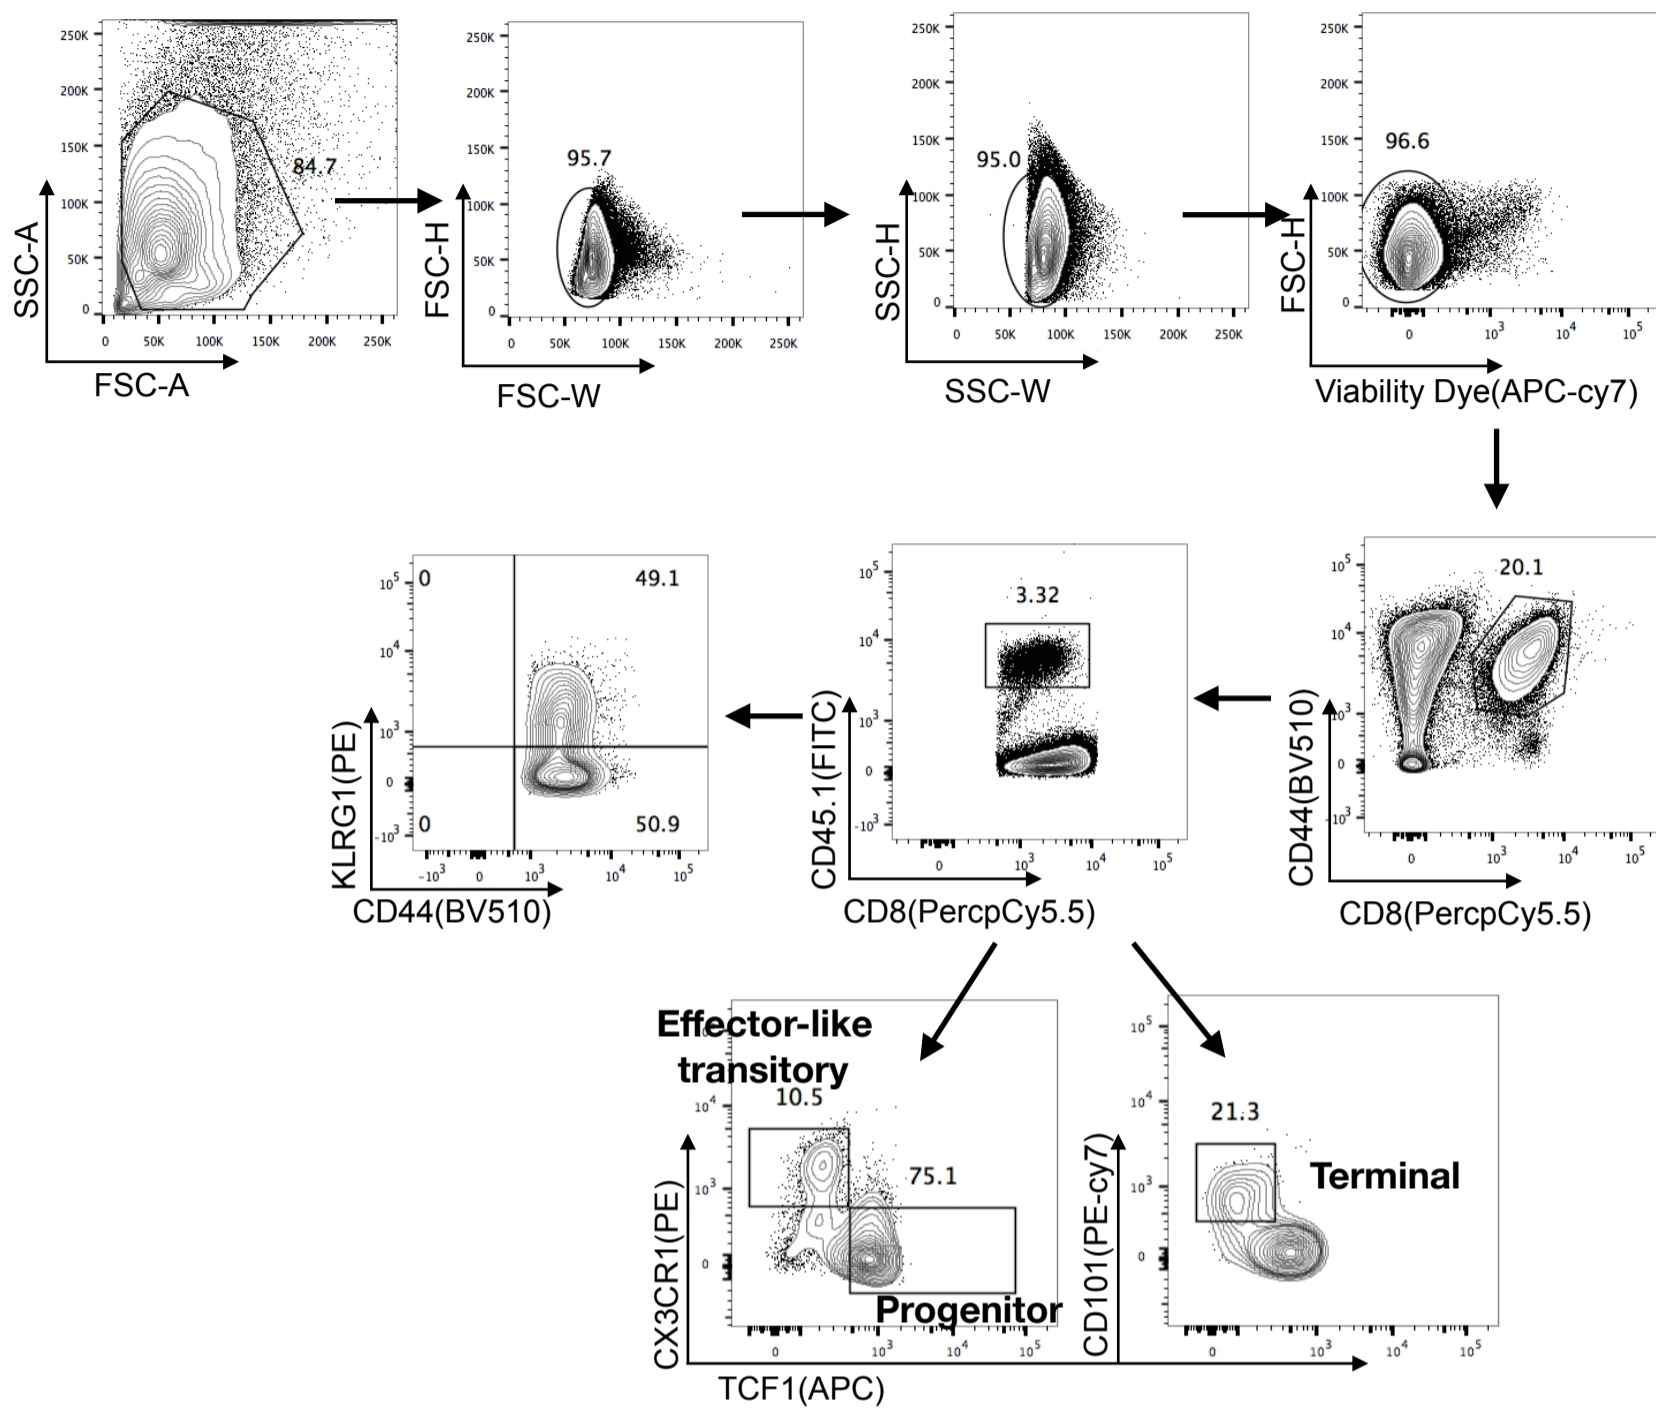

Supplement: CAS-112-3437-s003.pdf [file CAS-112-3437-s003.pdf]

**Fig. S5a**

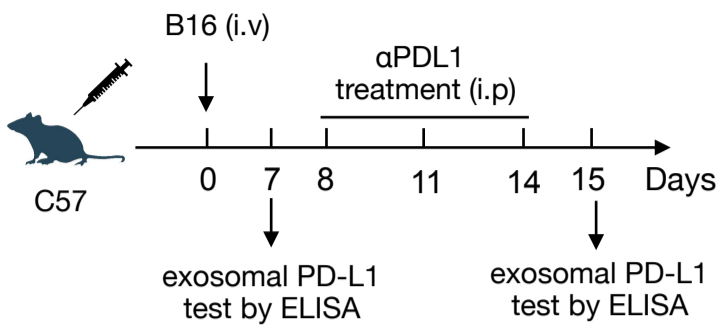

**Fig. S5b**

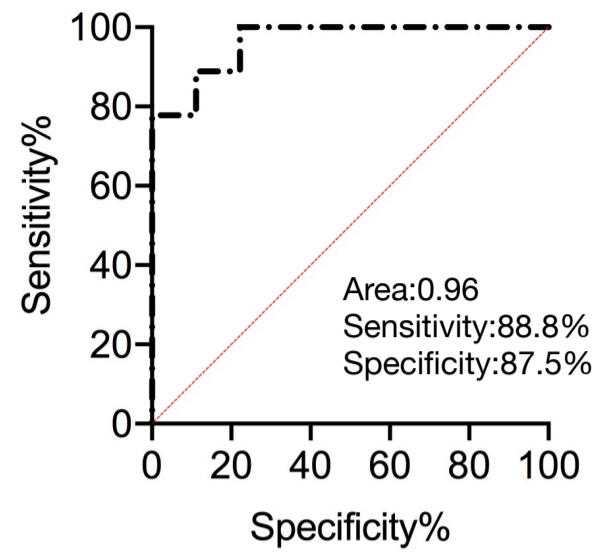

**Fig. S5c**

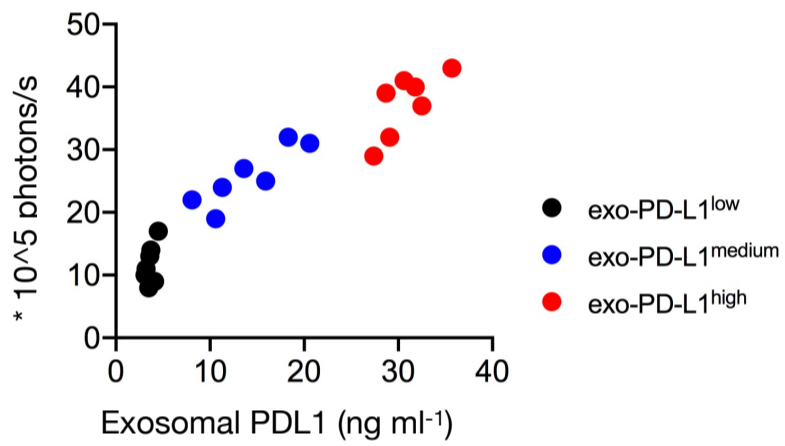

Supplement: CAS-112-3437-s004.pdf [file CAS-112-3437-s004.pdf]

**Fig. S1a**

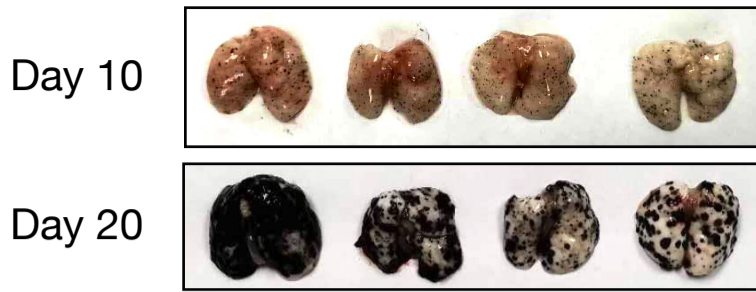

**Fig. S1b**

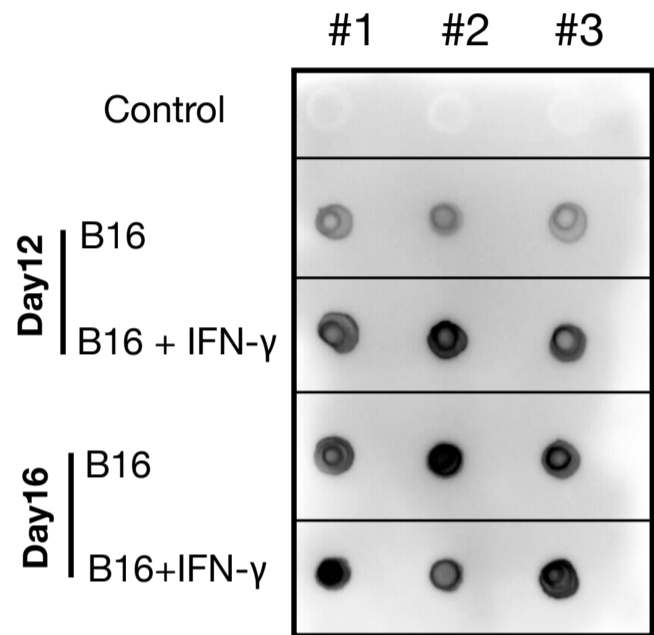

**Fig. S1c**

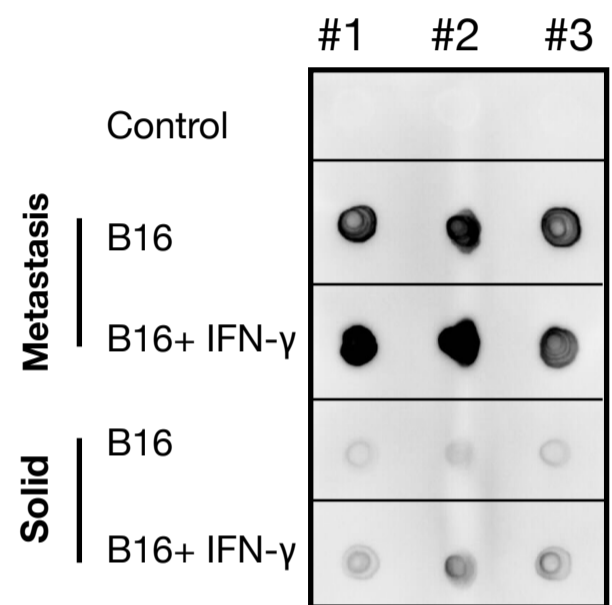

Supplement: CAS-112-3437-s005.pdf [file CAS-112-3437-s005.pdf]

**Fig. S4a**

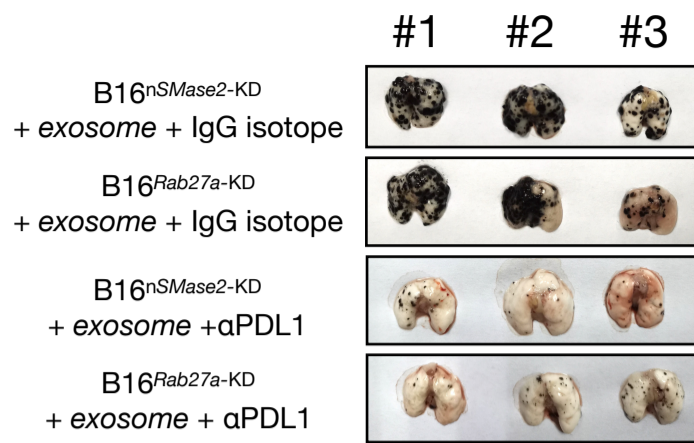

**Fig. S4b**

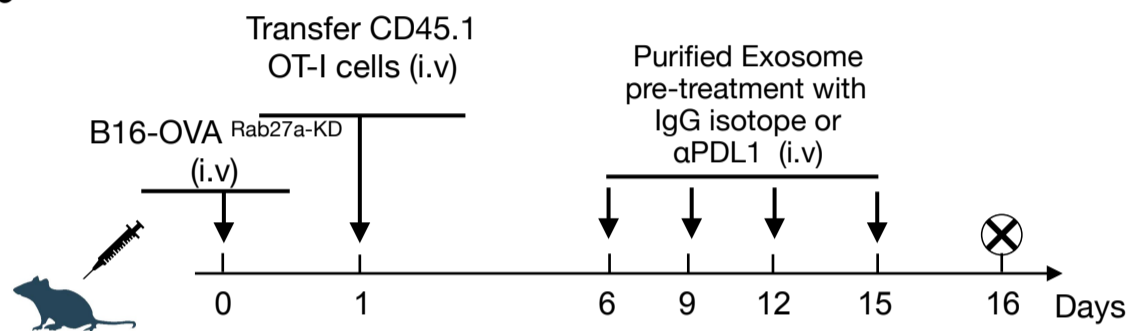

**Fig. S4c**

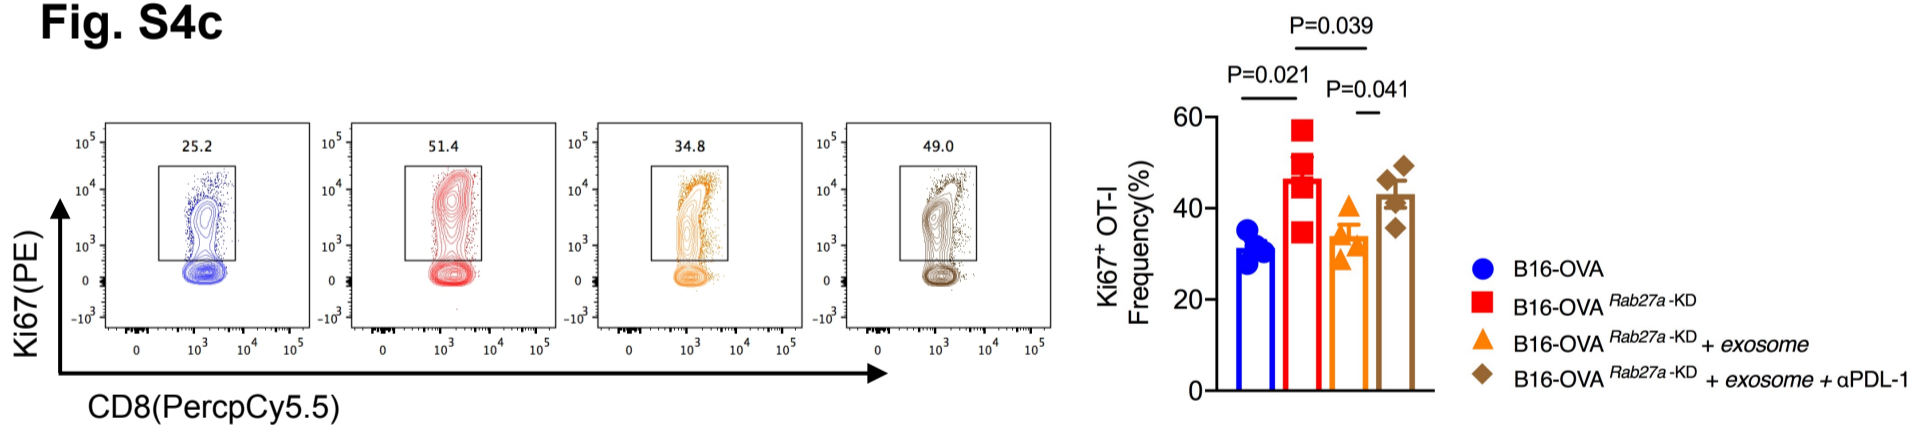

Supplement: CAS-112-3437-s006.pdf [file CAS-112-3437-s006.pdf]

**Fig. S2a**

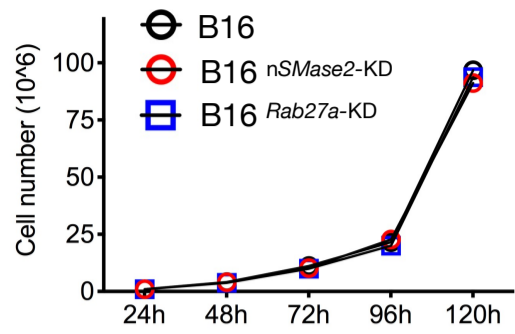

**Fig. S2b**

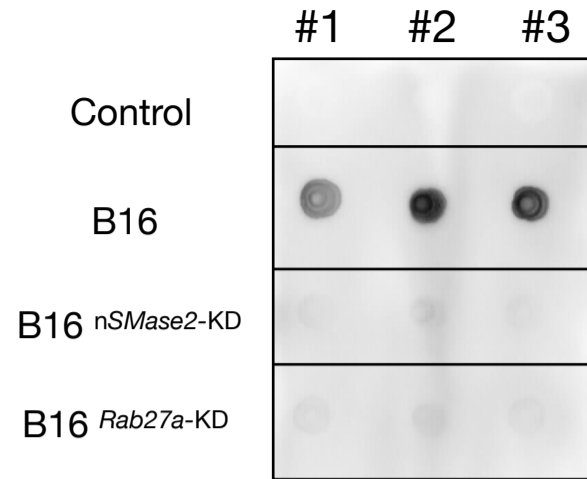

**Fig. S2c**

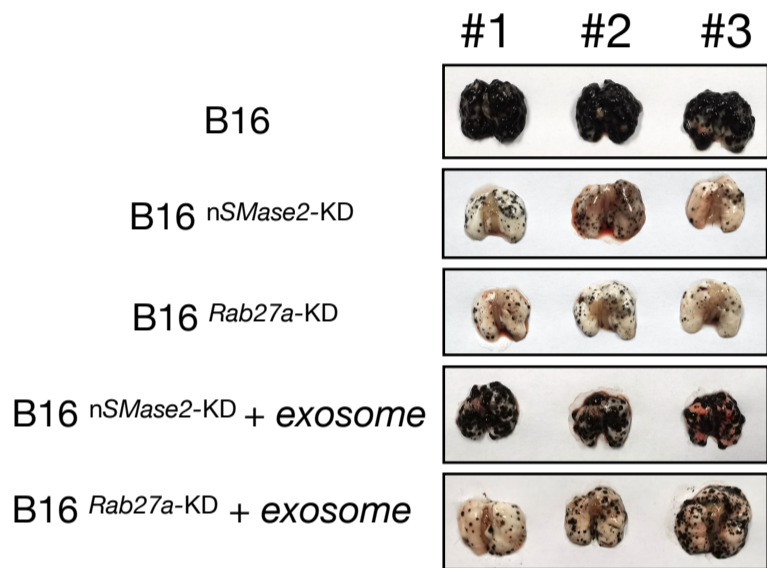

**Fig. S2d**

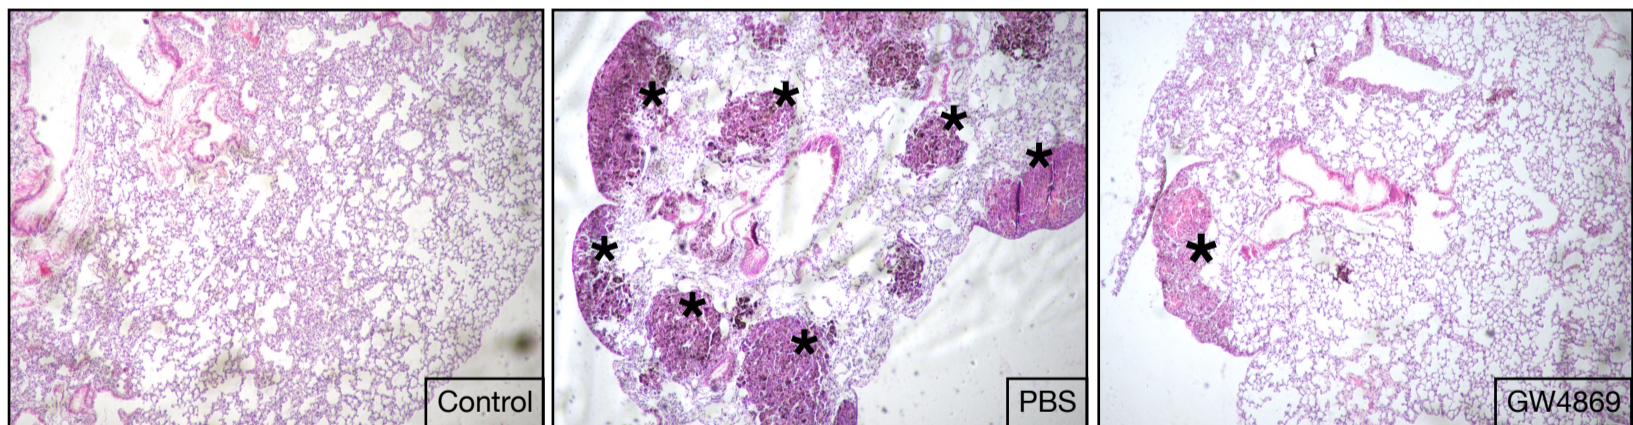

Supplement: CAS-112-3437-s007.pdf [file CAS-112-3437-s007.pdf]
